# Supplementary material for: USP7 aggravates diabetic cardiomyopathy by stabilizing Keap1 to govern cardiac oxidative stress and pyroptosis
Source: Research Square preprint supplement (doi:10.21203/rs.3.rs-7334691/v1), 2025-09-02

USP7 aggravates diabetic cardiomyopathy by stabilizing Keap1 to govern cardiac oxidative stress-induced pyroptosis

**The western blot analysis of tissue protein USP7 shown in Figure 1A**


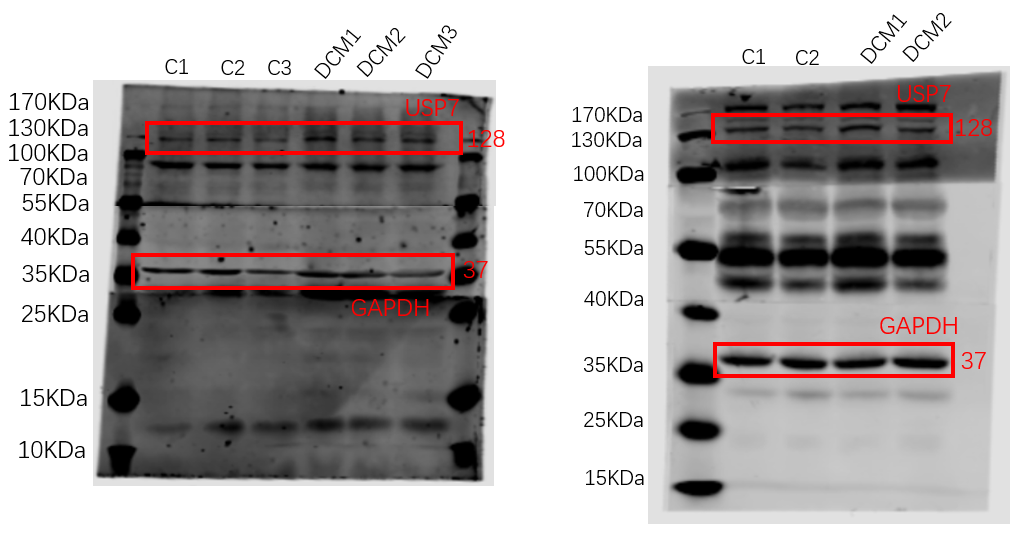


**The western blot analysis of tissue protein NLRP3 shown in Figure 3A**


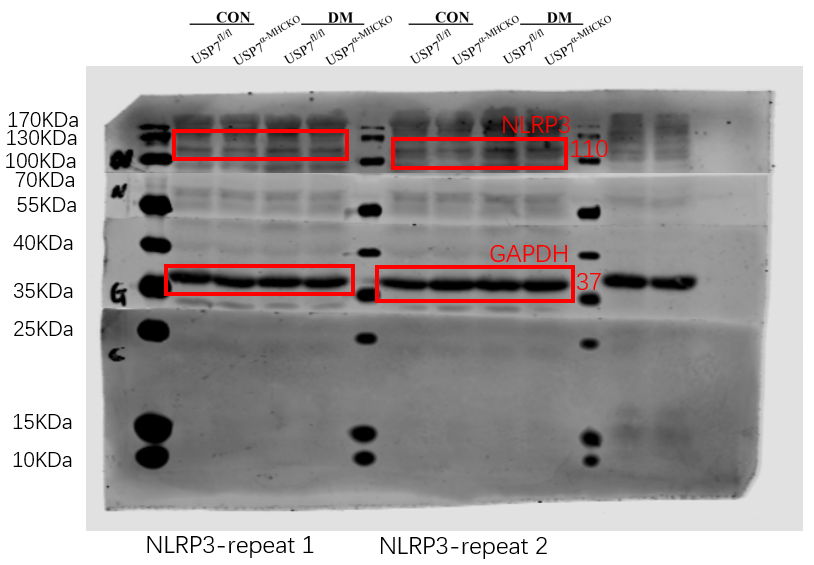


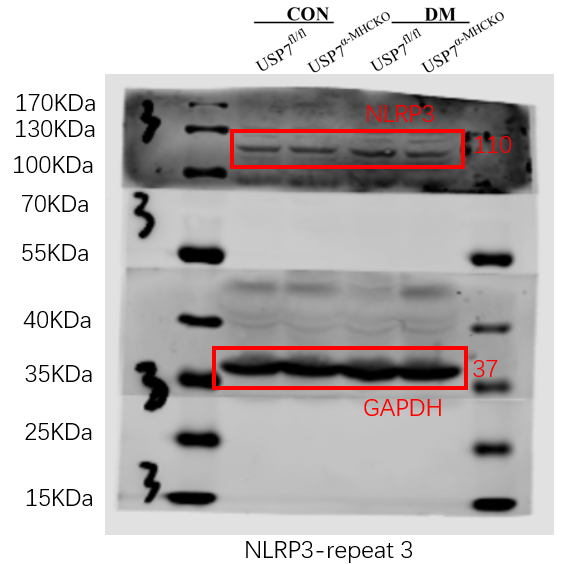


**The western blot analysis of tissue protein Caspase1 shown in Figure 3A**


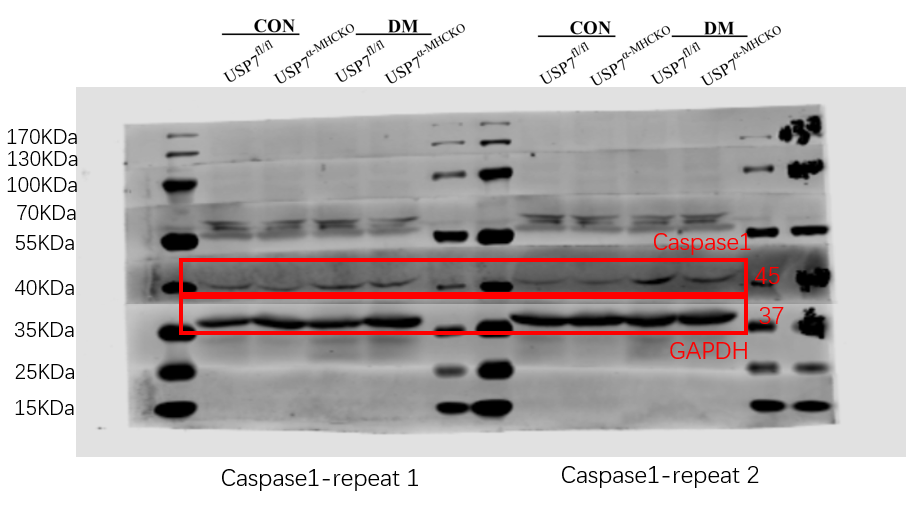


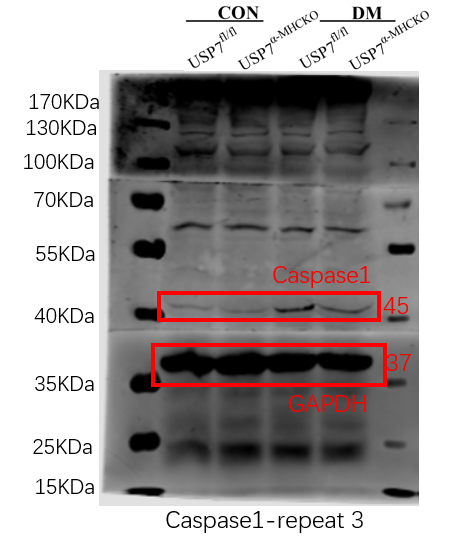


**The western blot analysis of tissue protein GSDMD shown in Figure 3A**


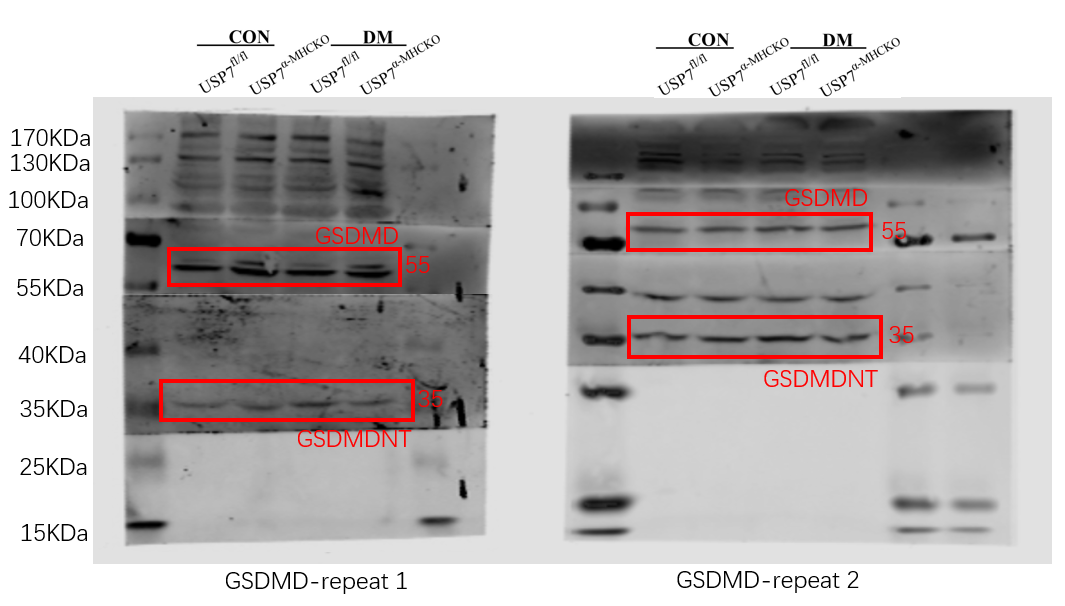


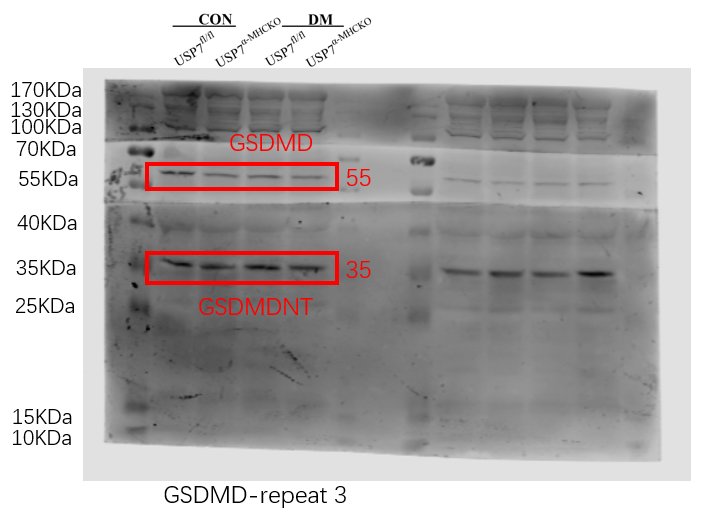


**The western blot analysis of tissue protein NLRP3 shown in Figure 3C**


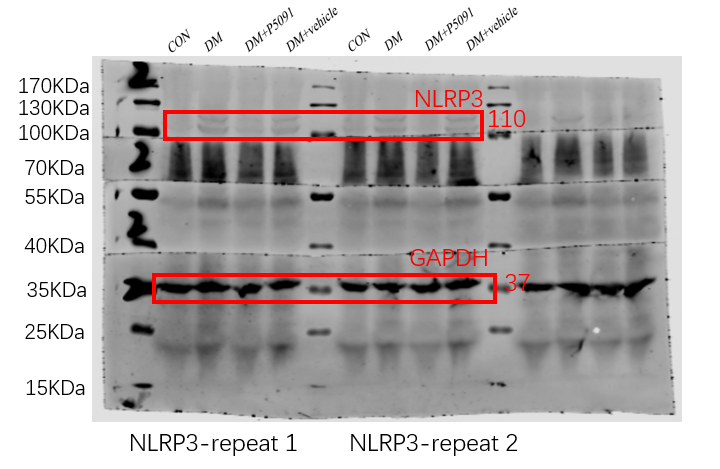


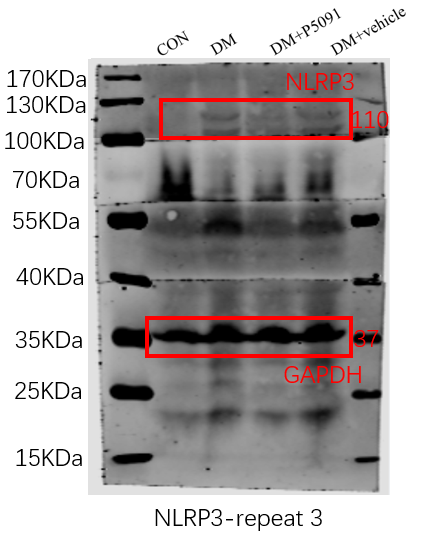


**The western blot analysis of tissue protein Caspase1 shown in Figure 3C**


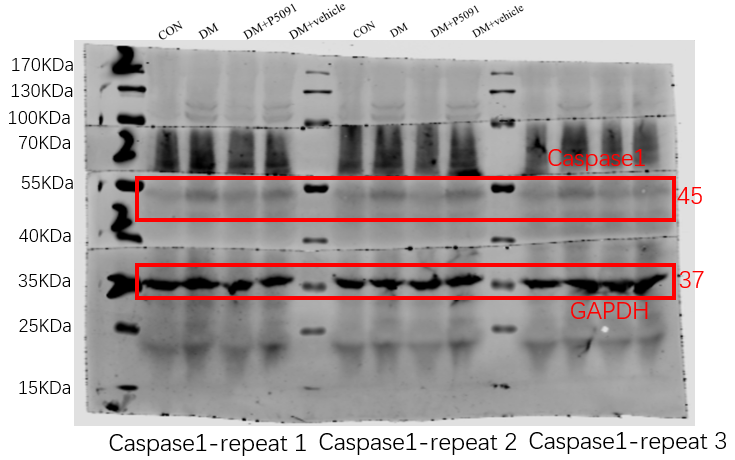


**The western blot analysis of tissue protein GSDMD shown in Figure 3C**


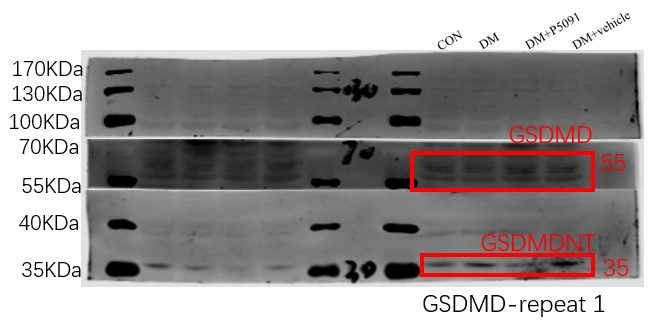


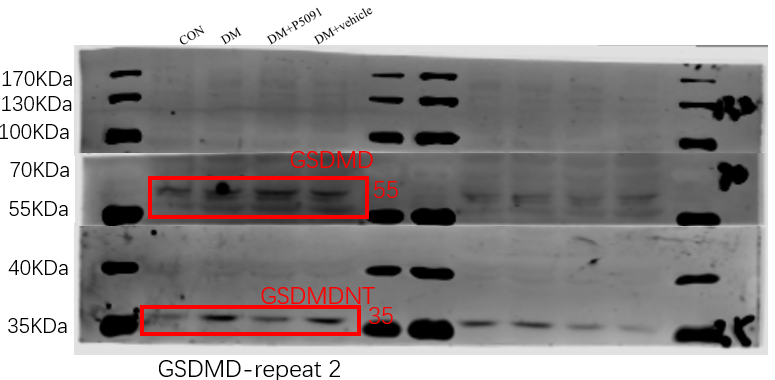


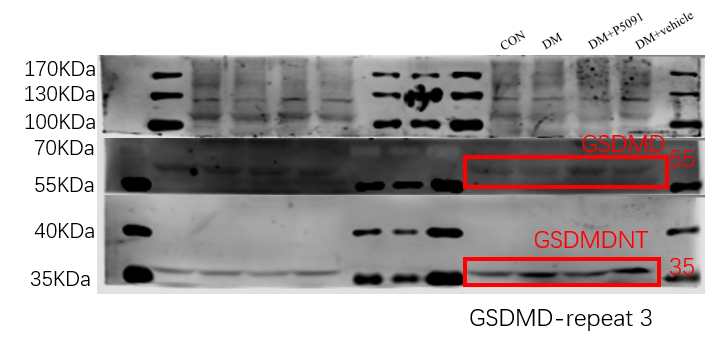


**The western blot analysis of cell protein USP7 shown in Figure 4B**


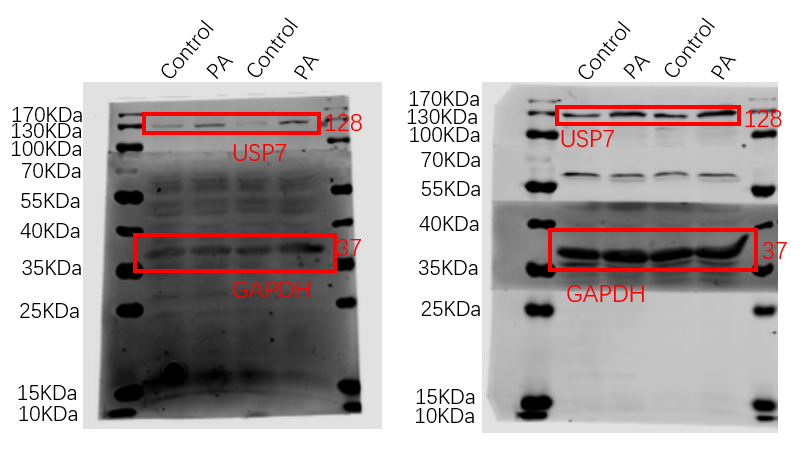


**The western blot analysis of cell protein NLRP3 shown in Figure 4N**


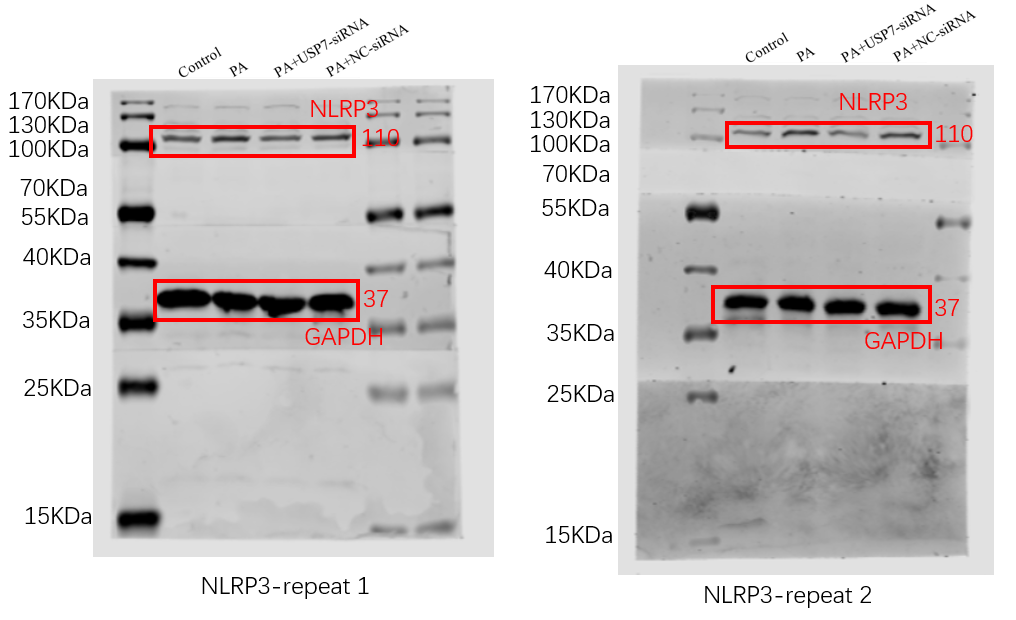


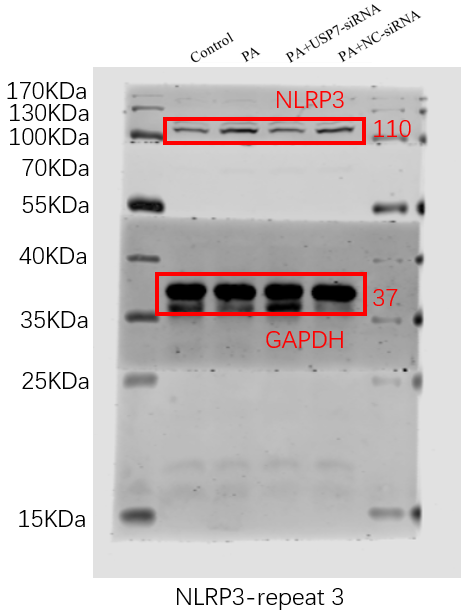


**The western blot analysis of cell protein Caspase1 shown in Figure 4N**


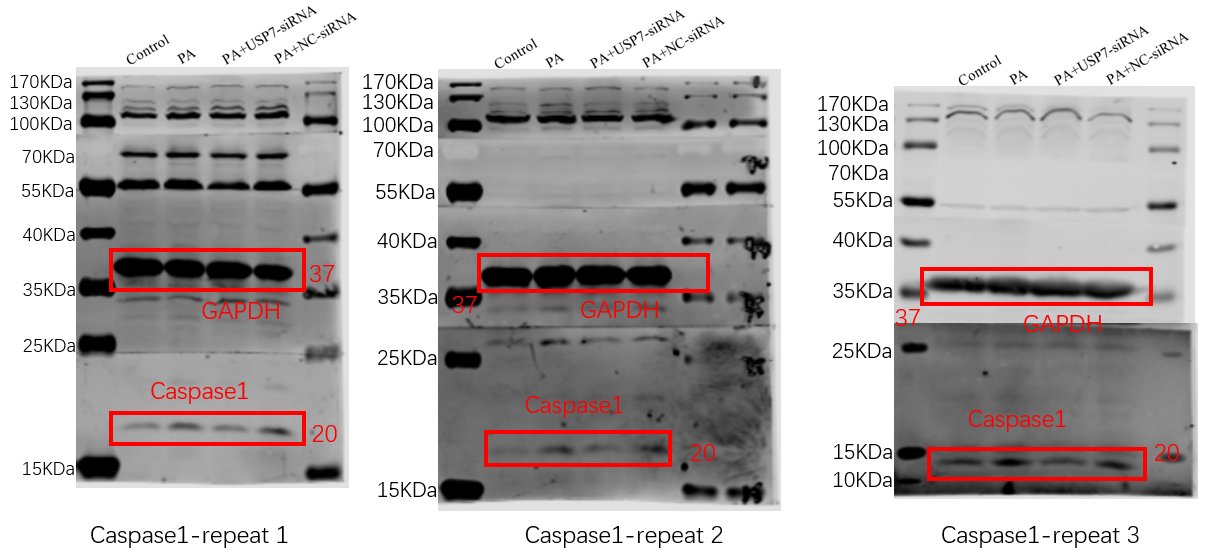


**The western blot analysis of cell protein GSDMD shown in Figure 4N**


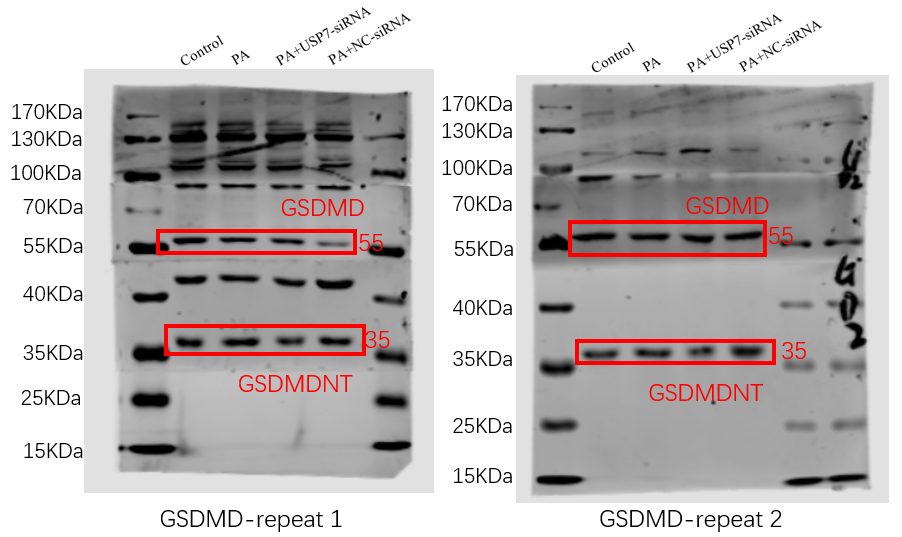

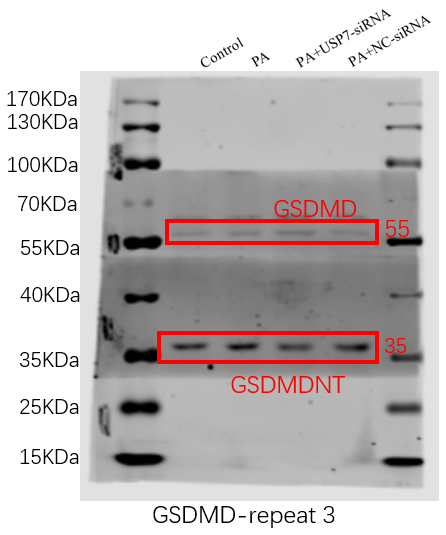


**The western blot analysis of tissue protein Keap1 shown in Figure 5A**


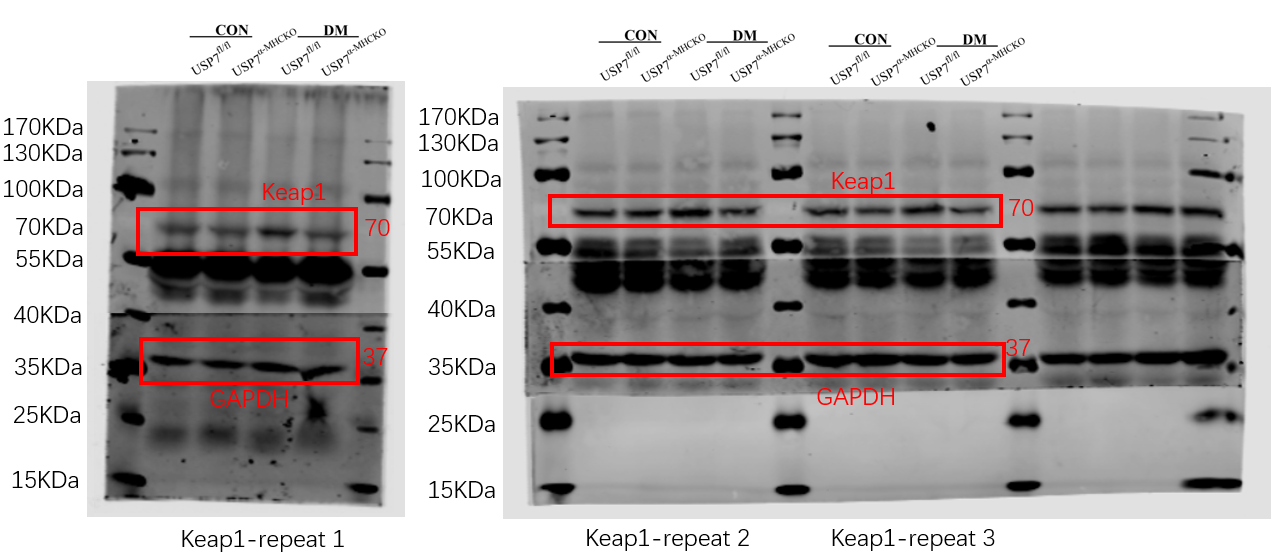


**The western blot analysis of tissue protein Nrf2 shown in Figure 5A**


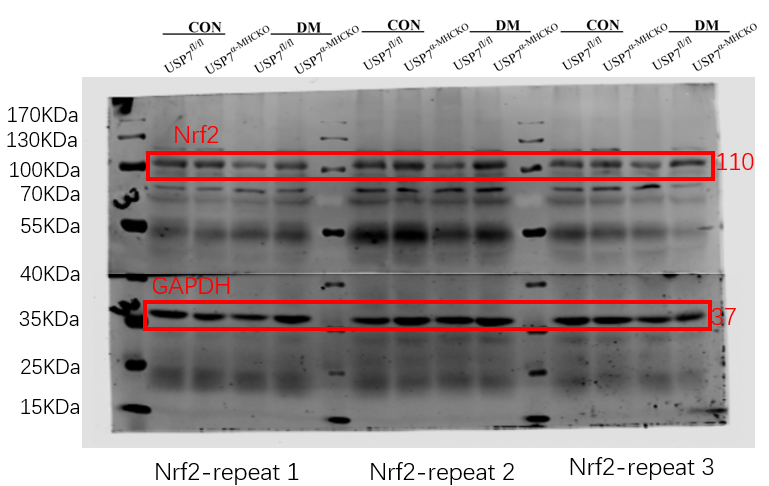


**The western blot analysis of tissue protein Keap1 shown in Figure 5C**


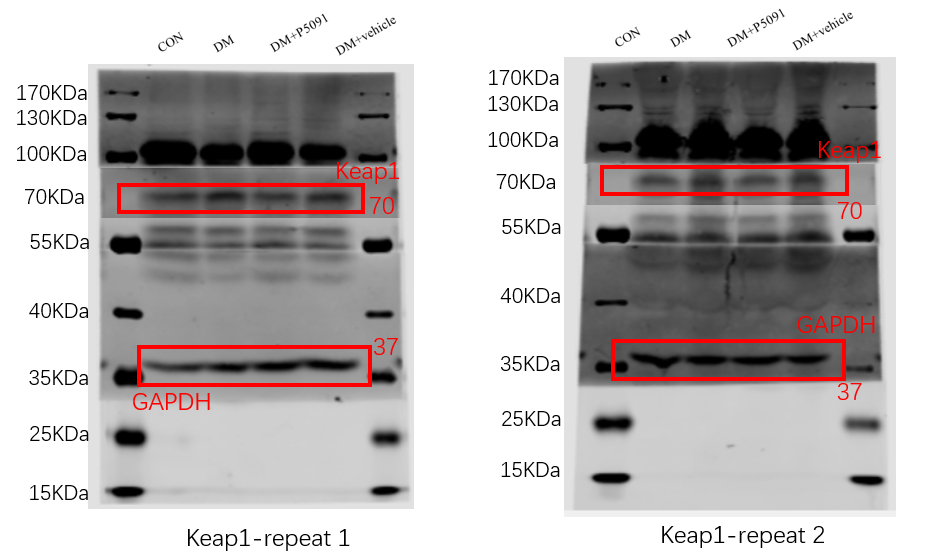

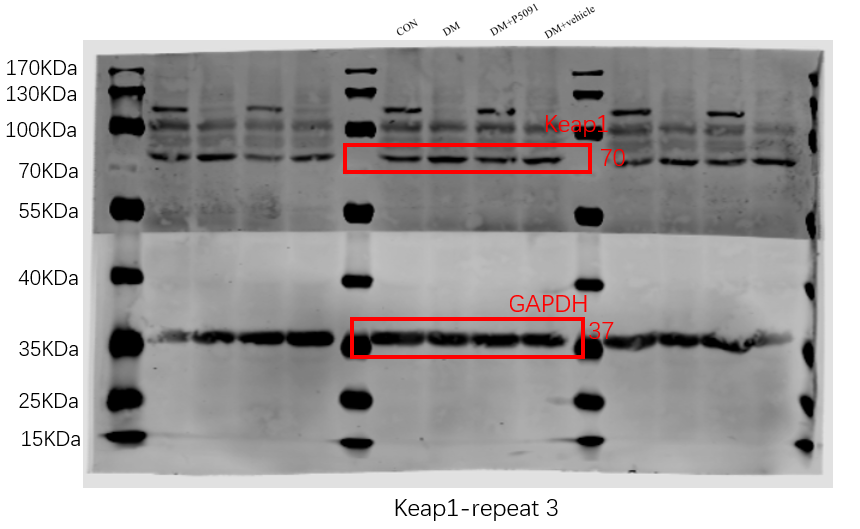


**The western blot analysis of tissue protein Nrf2 shown in Figure 5C**


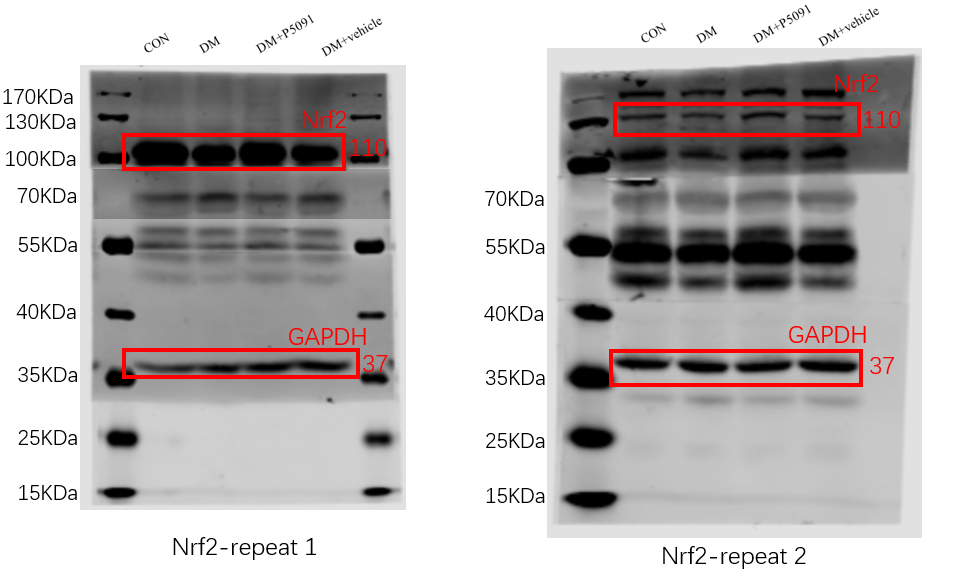

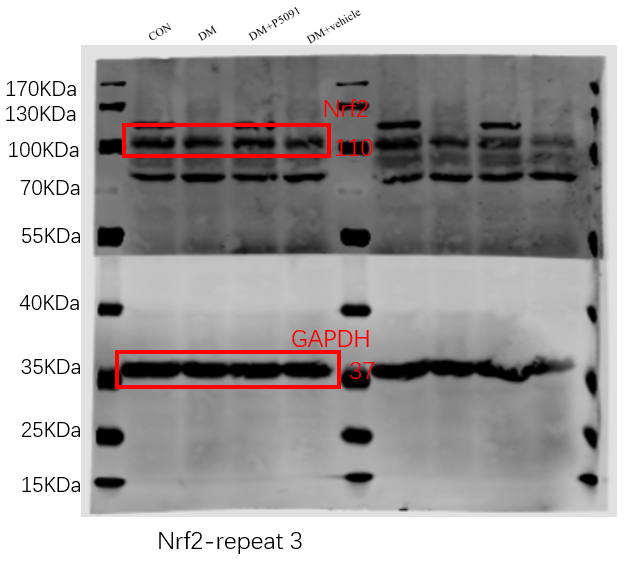


**The western blot analysis of cell protein Keap1 shown in Figure 5E**


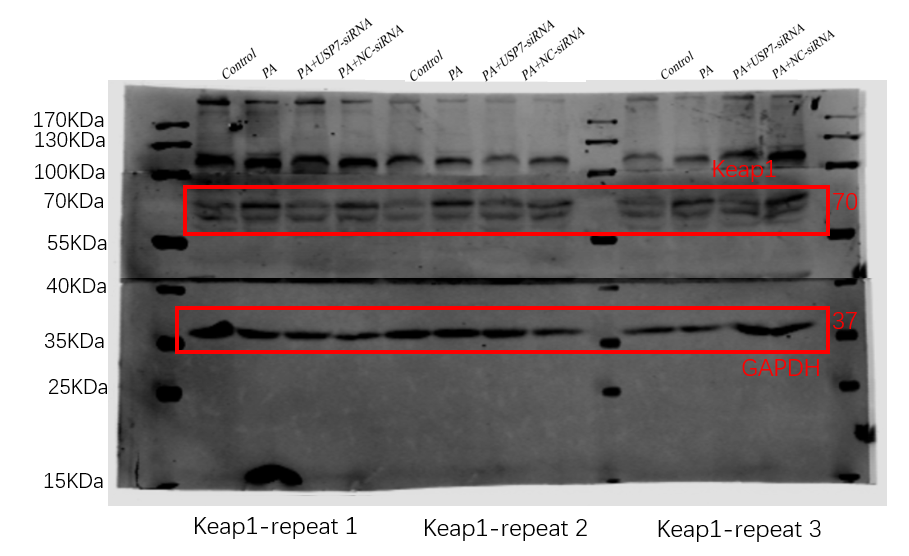


**The western blot analysis of cell protein Nrf2 shown in Figure 5E**


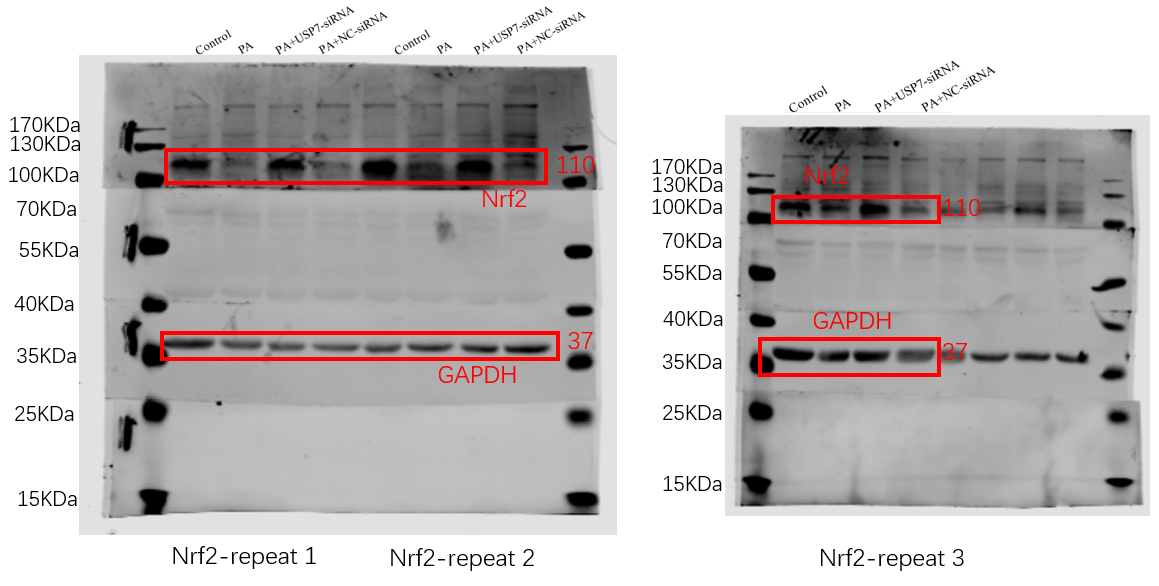


**The western blot analysis of cell protein Keap1 shown in Figure 5G**


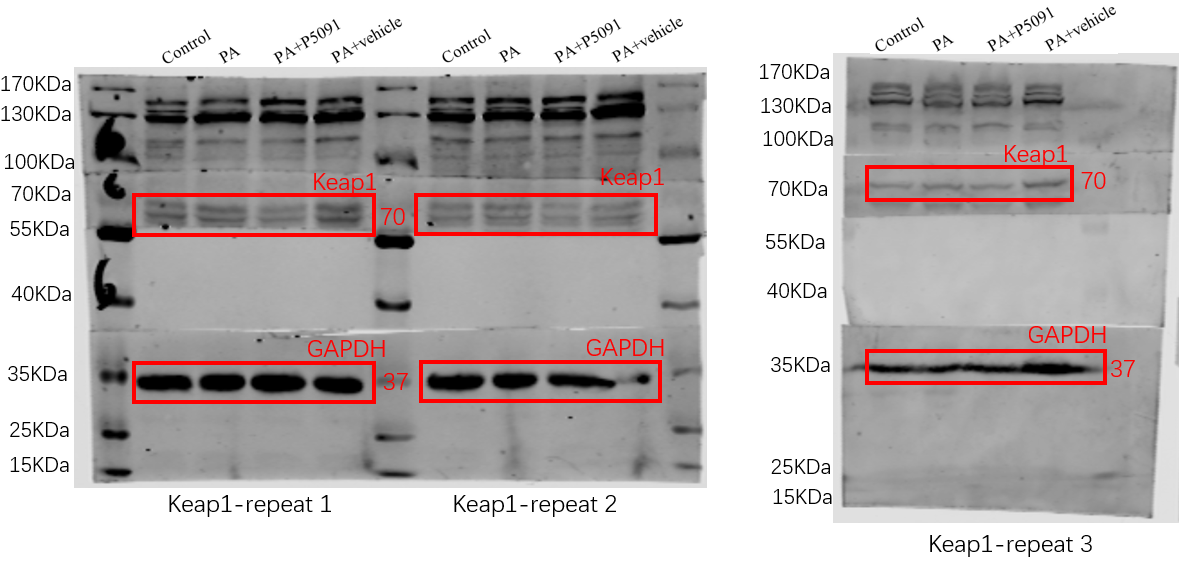


**The western blot analysis of cell protein Nrf2 shown in Figure 5G**


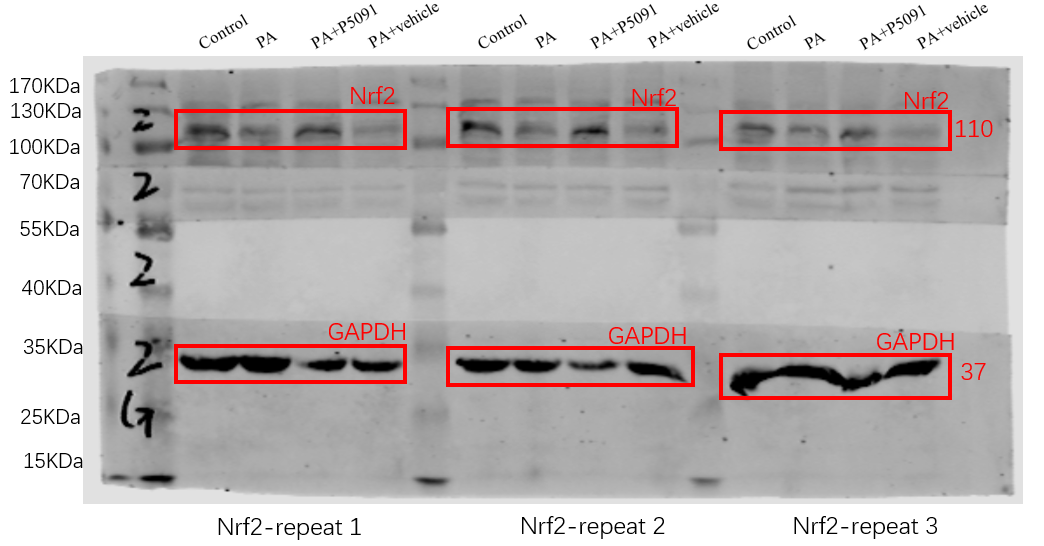


**The western blot analysis of cell protein Nrf2 shown in Figure 5I**


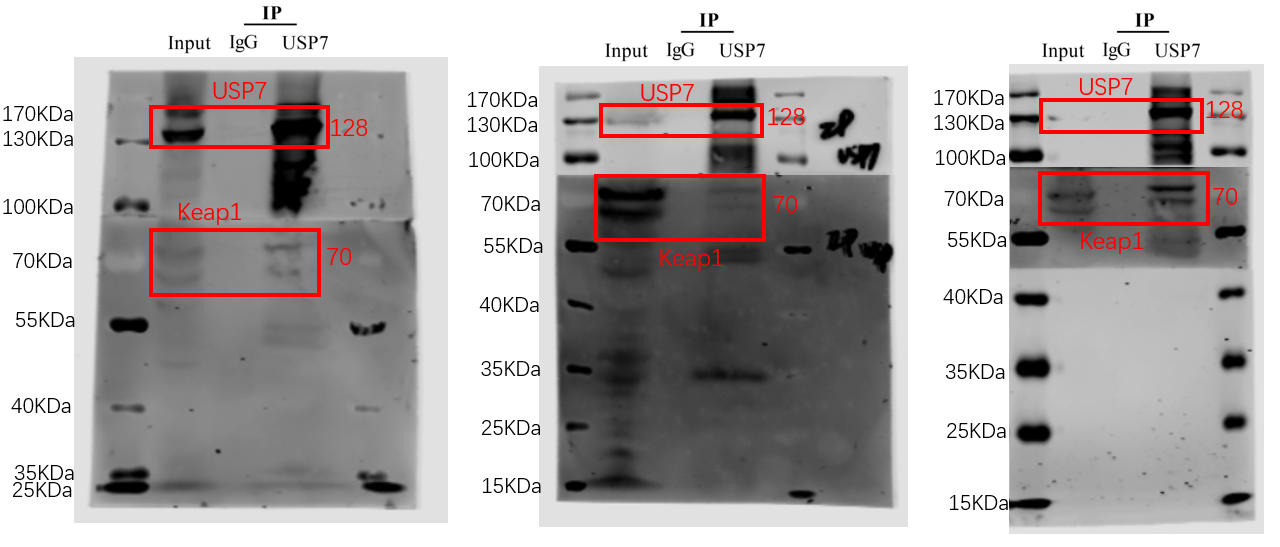


**The western blot analysis of cell protein Nrf2 shown in Figure 5J**


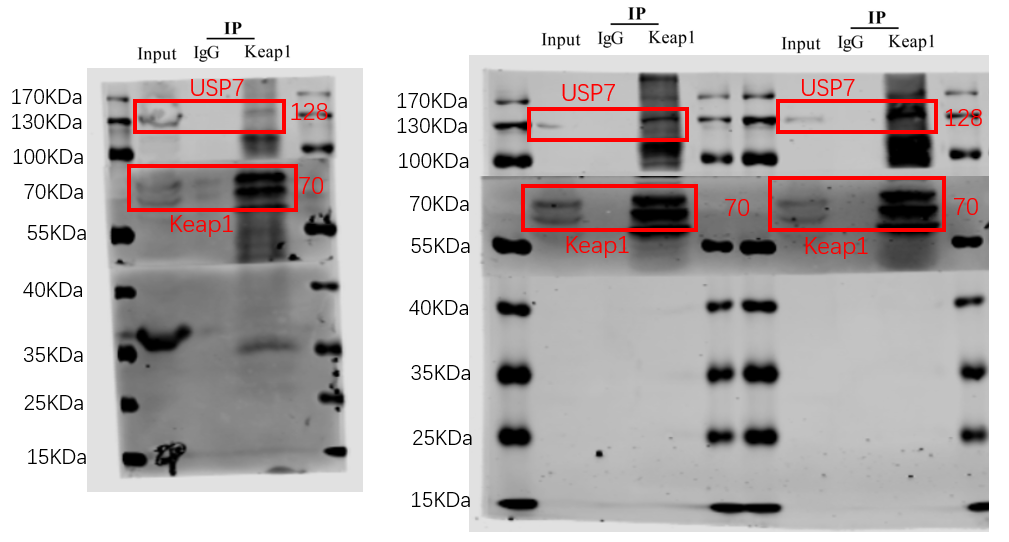


**The western blot analysis of cell protein Nrf2 shown in Figure 5K**


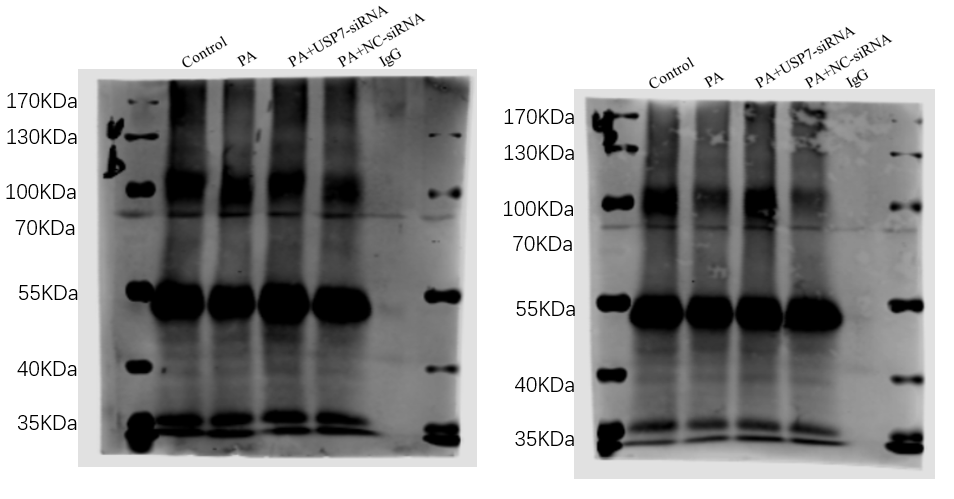

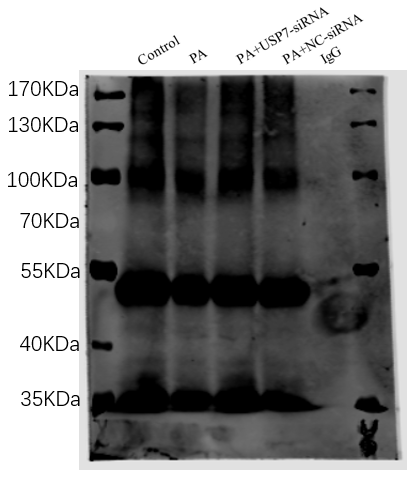


**The western blot analysis of cell protein USP7 shown in Figure 6A**


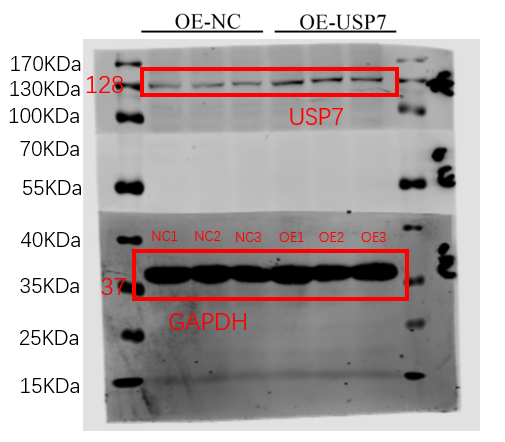


**The western blot analysis of cell protein Keap1 shown in Figure 6B**


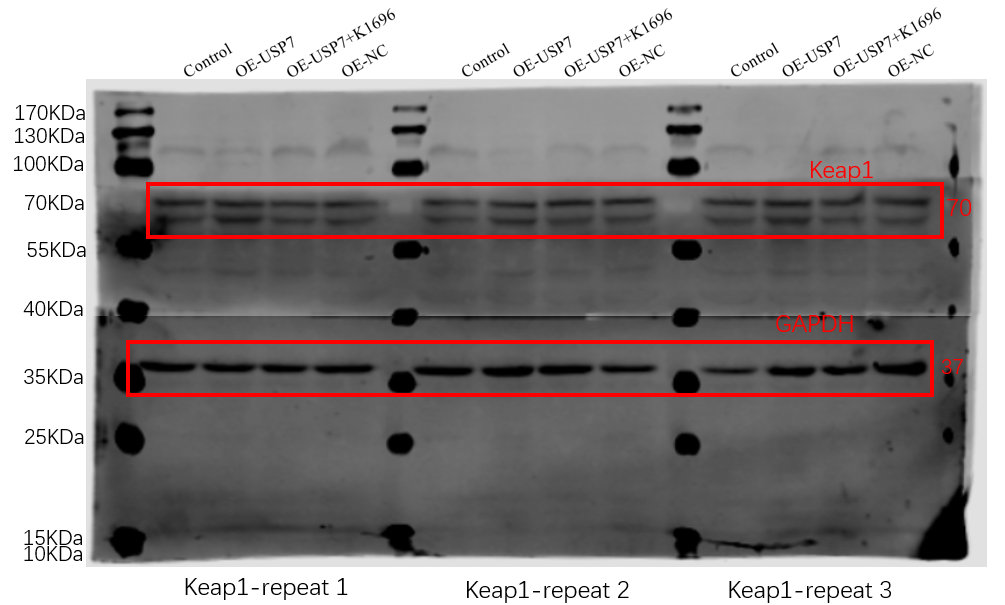


**The western blot analysis of cell protein Nrf2 shown in Figure 6B**


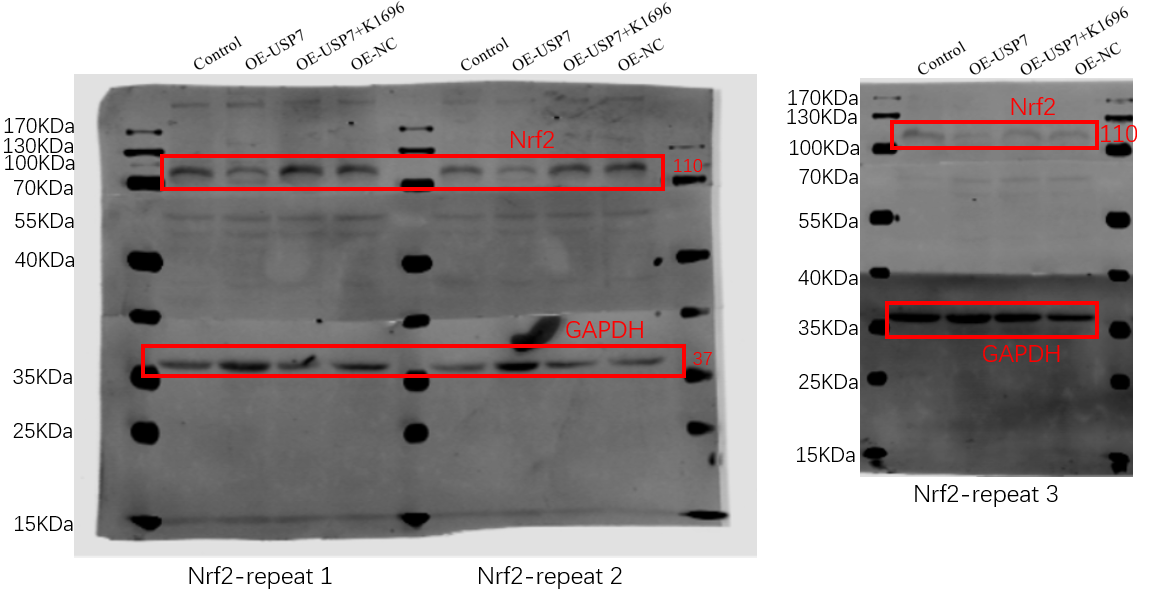


**The western blot analysis of cell protein NLRP3 shown in Figure 6B**


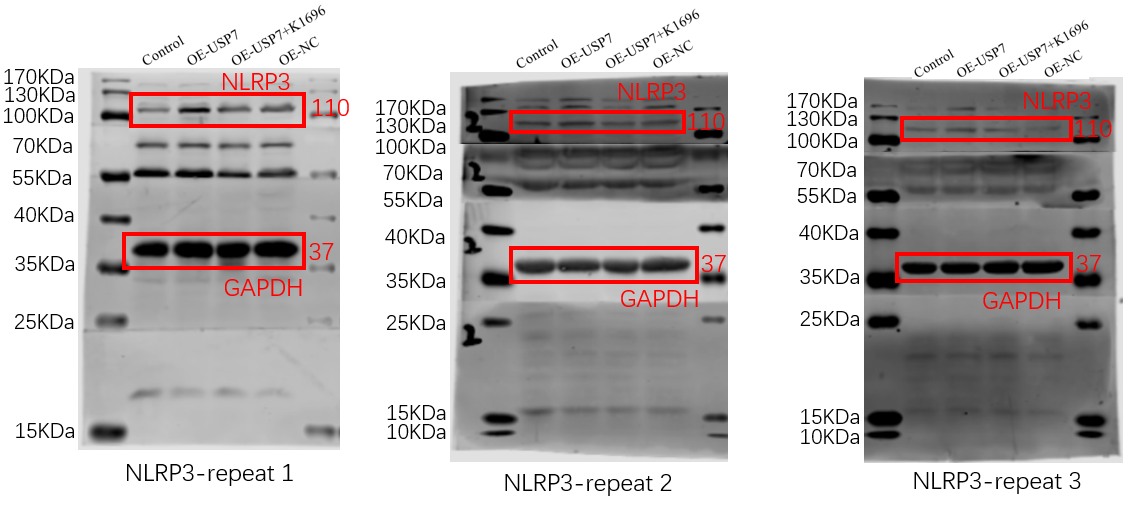


**The western blot analysis of cell protein Caspase1 shown in Figure 6B**


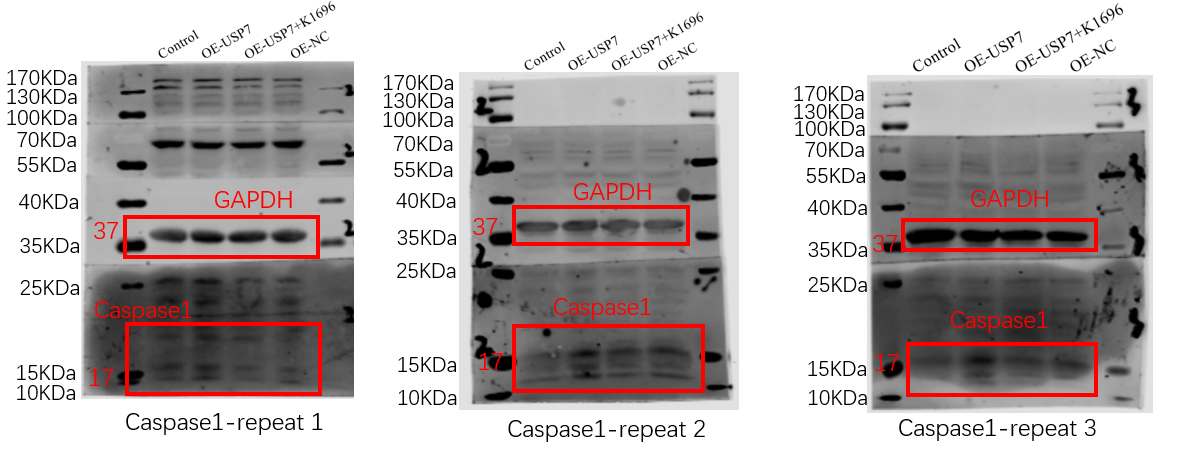


**The western blot analysis of cell protein GSDMD shown in Figure 6B**


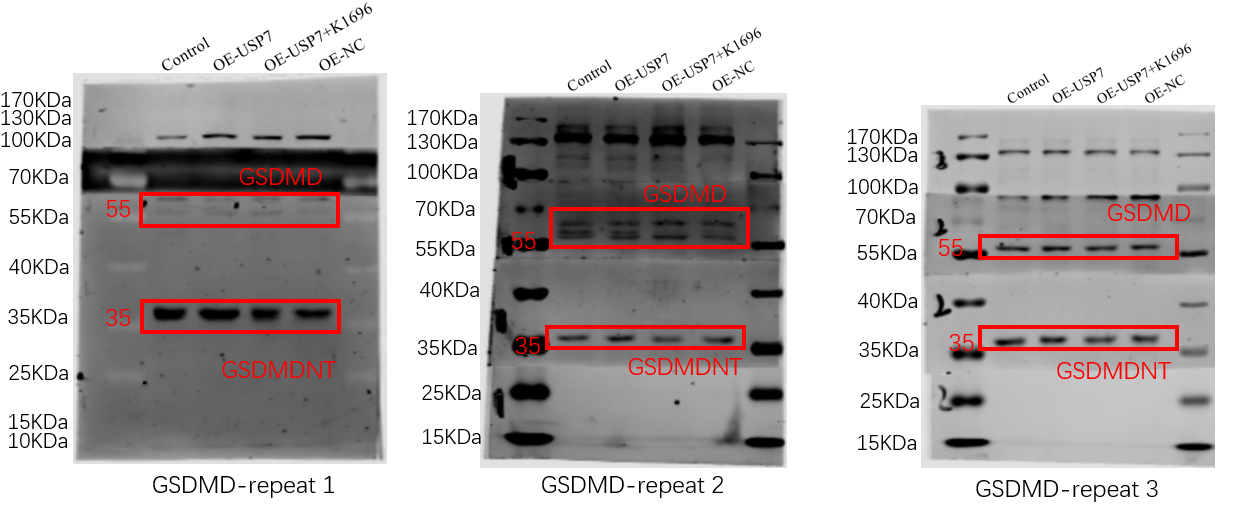


**The western blot analysis of tissue protein USP7 shown in Figure S1C**


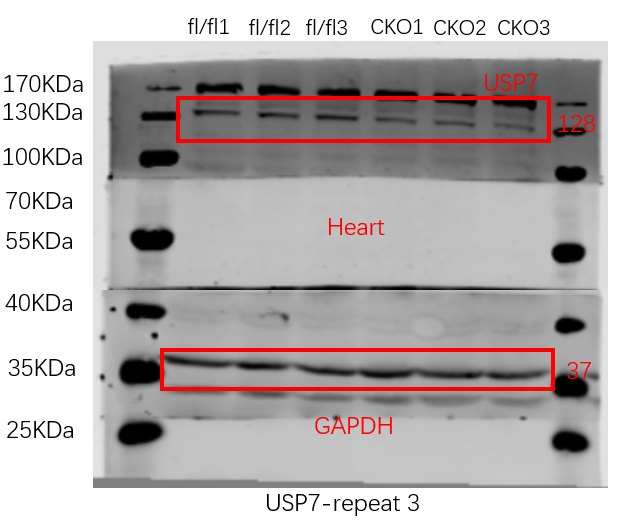

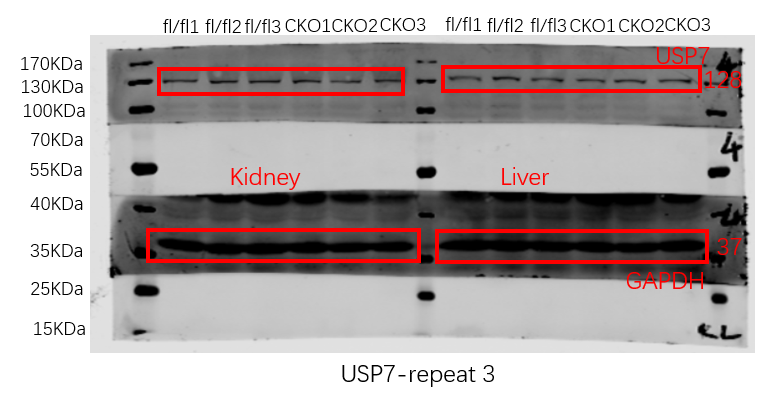


**The western blot analysis of cell protein USP7 shown in Figure S1E**


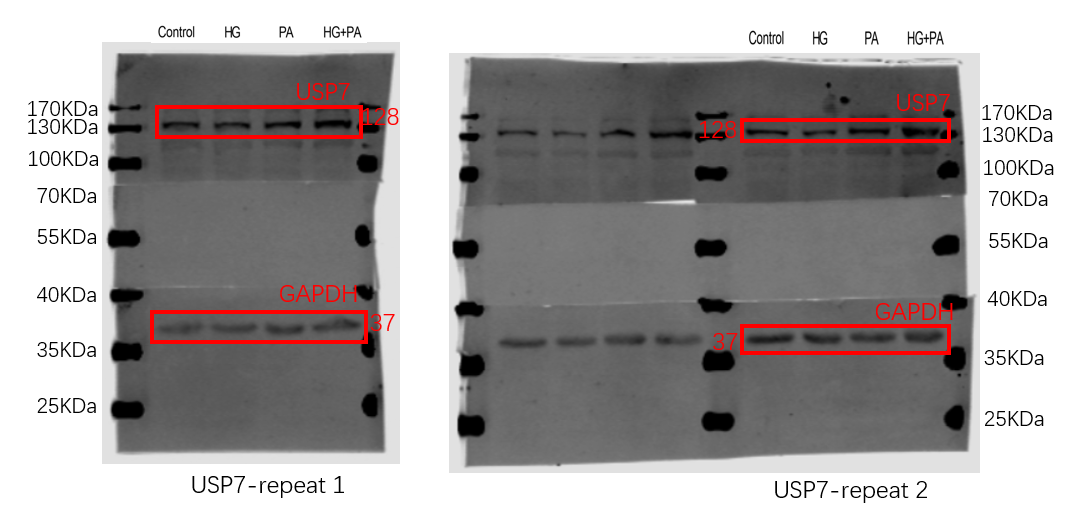

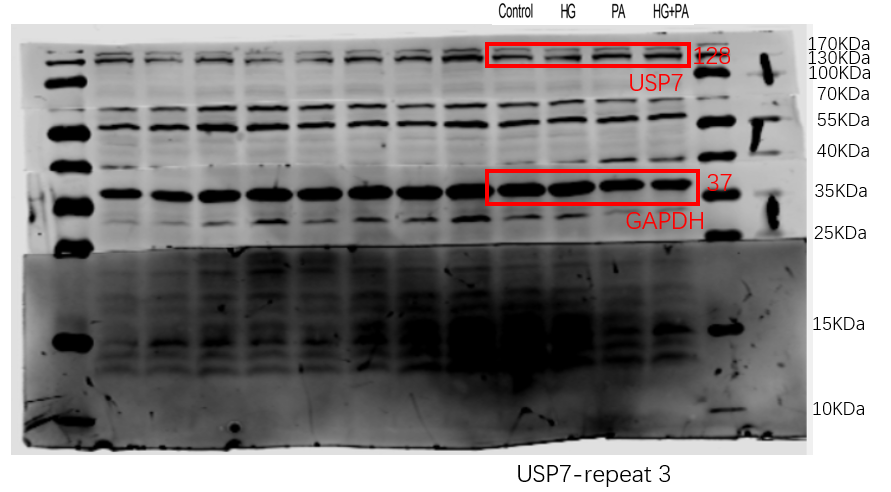


**The western blot analysis of cell protein NLRP3 shown in Figure S2A**


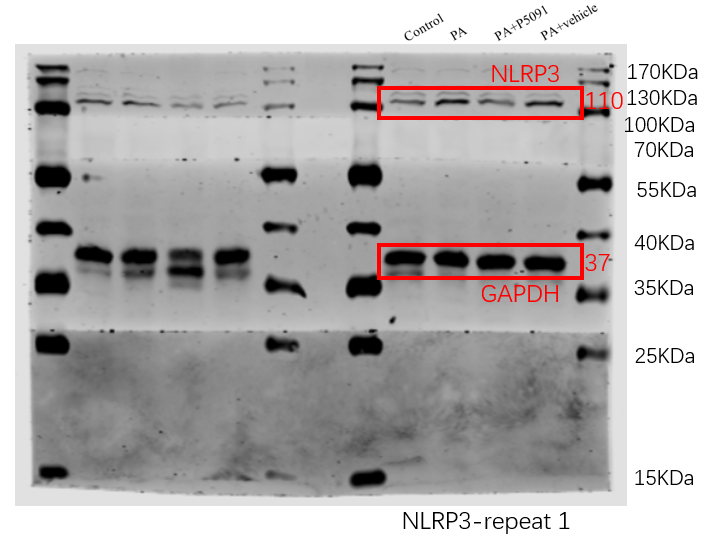


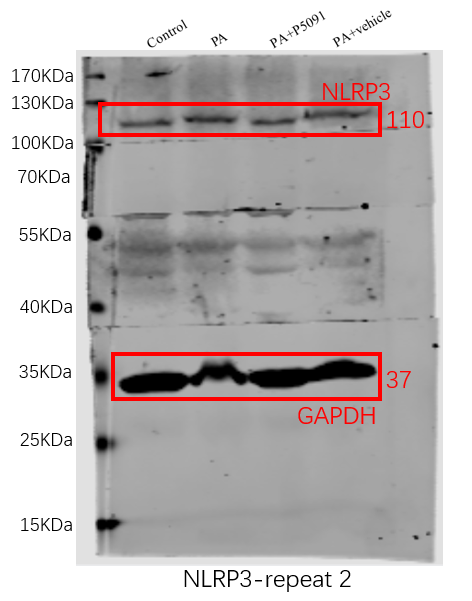


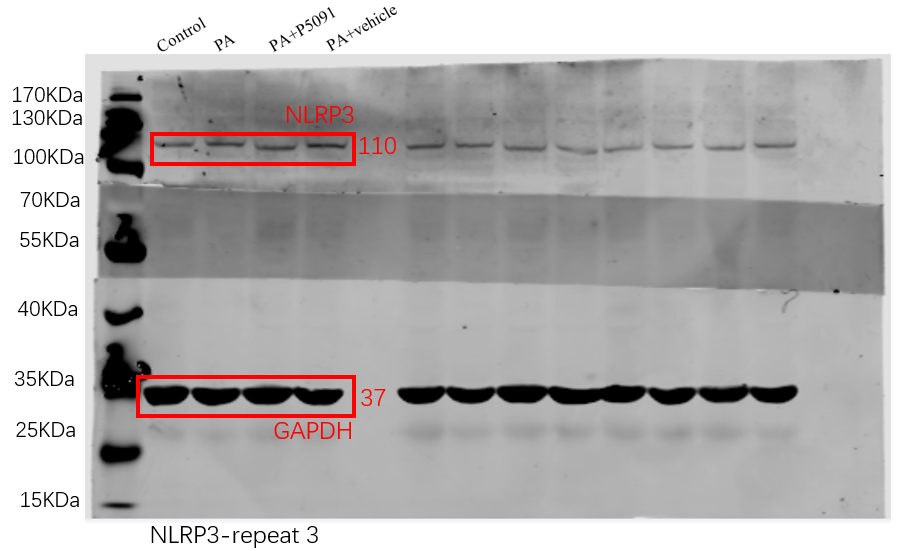


**The western blot analysis of cell protein Caspase1 shown in Figure S2A**


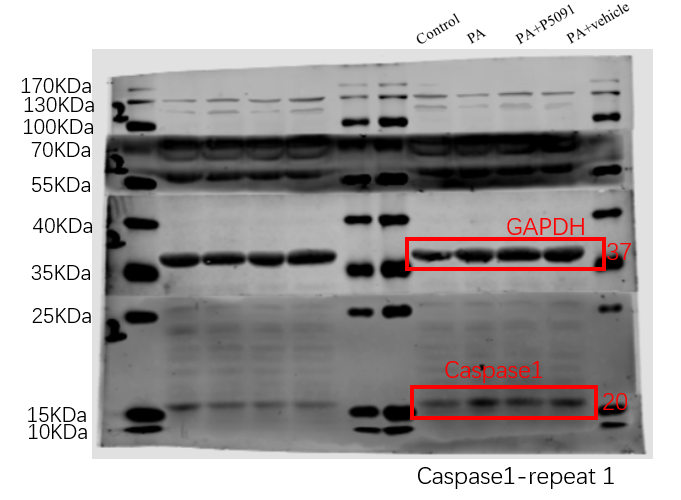

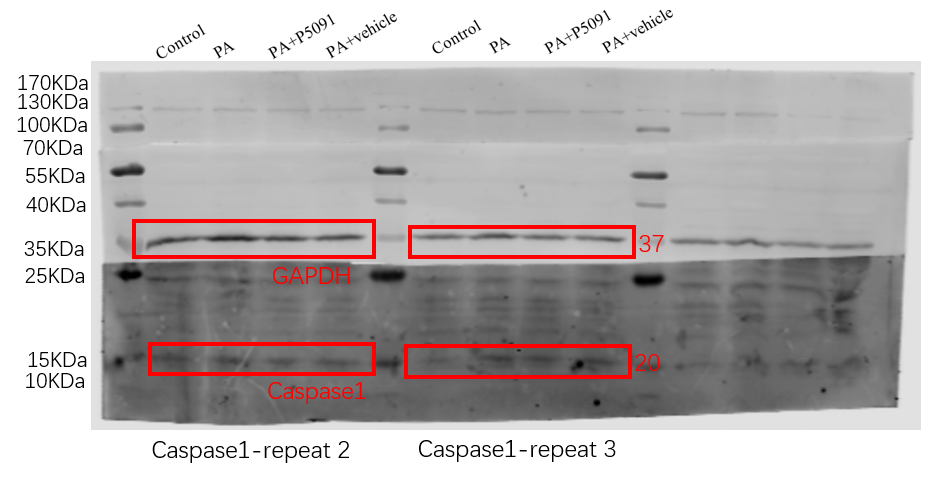


**The western blot analysis of cell protein GSDMD shown in Figure S2A**


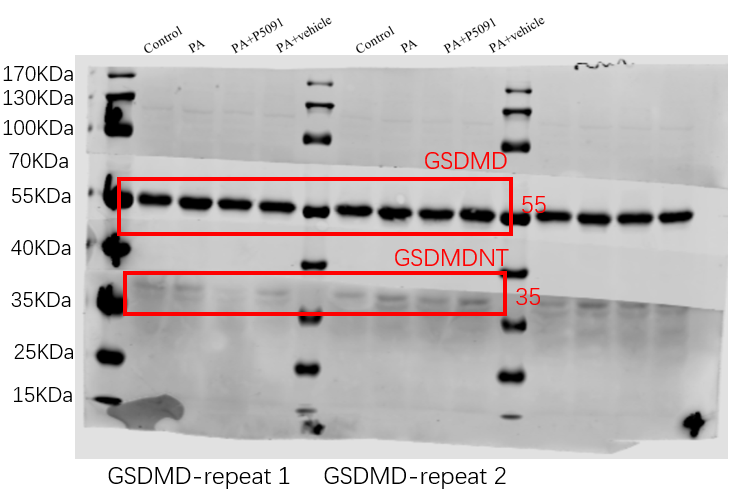

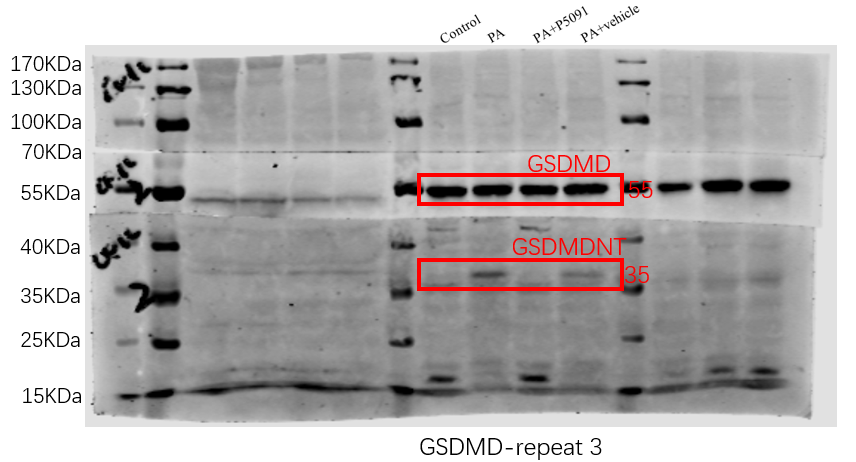

Supplement: Supplementary file 1 [file 9a01656277b9fa46328df0a7.docx]
