# Supplementary material for: USP7 aggravates diabetic cardiomyopathy by stabilizing Keap1 to govern cardiac oxidative stress and pyroptosis
Source: Research Square preprint supplement (doi:10.21203/rs.3.rs-7334691/v1), 2025-09-02
Supplement: Supplementary file 2 [file a0906f84bd6c1cda47a73d2c.docx]

## Supplementary Materials for

# USP7 aggravates diabetic cardiomyopathy by stabilizing Keap1 to govern cardiac oxidative stress and pyroptosis

Meiling Yan†, Zhou Liu†, Yifan Chen†, Liyan Su, Yu Mei, Guida Cai, Kaile Wu, Yang Xiao, Jingfei Zhang, Lexun Wang, Jiao Guo*

**Fig S1.**


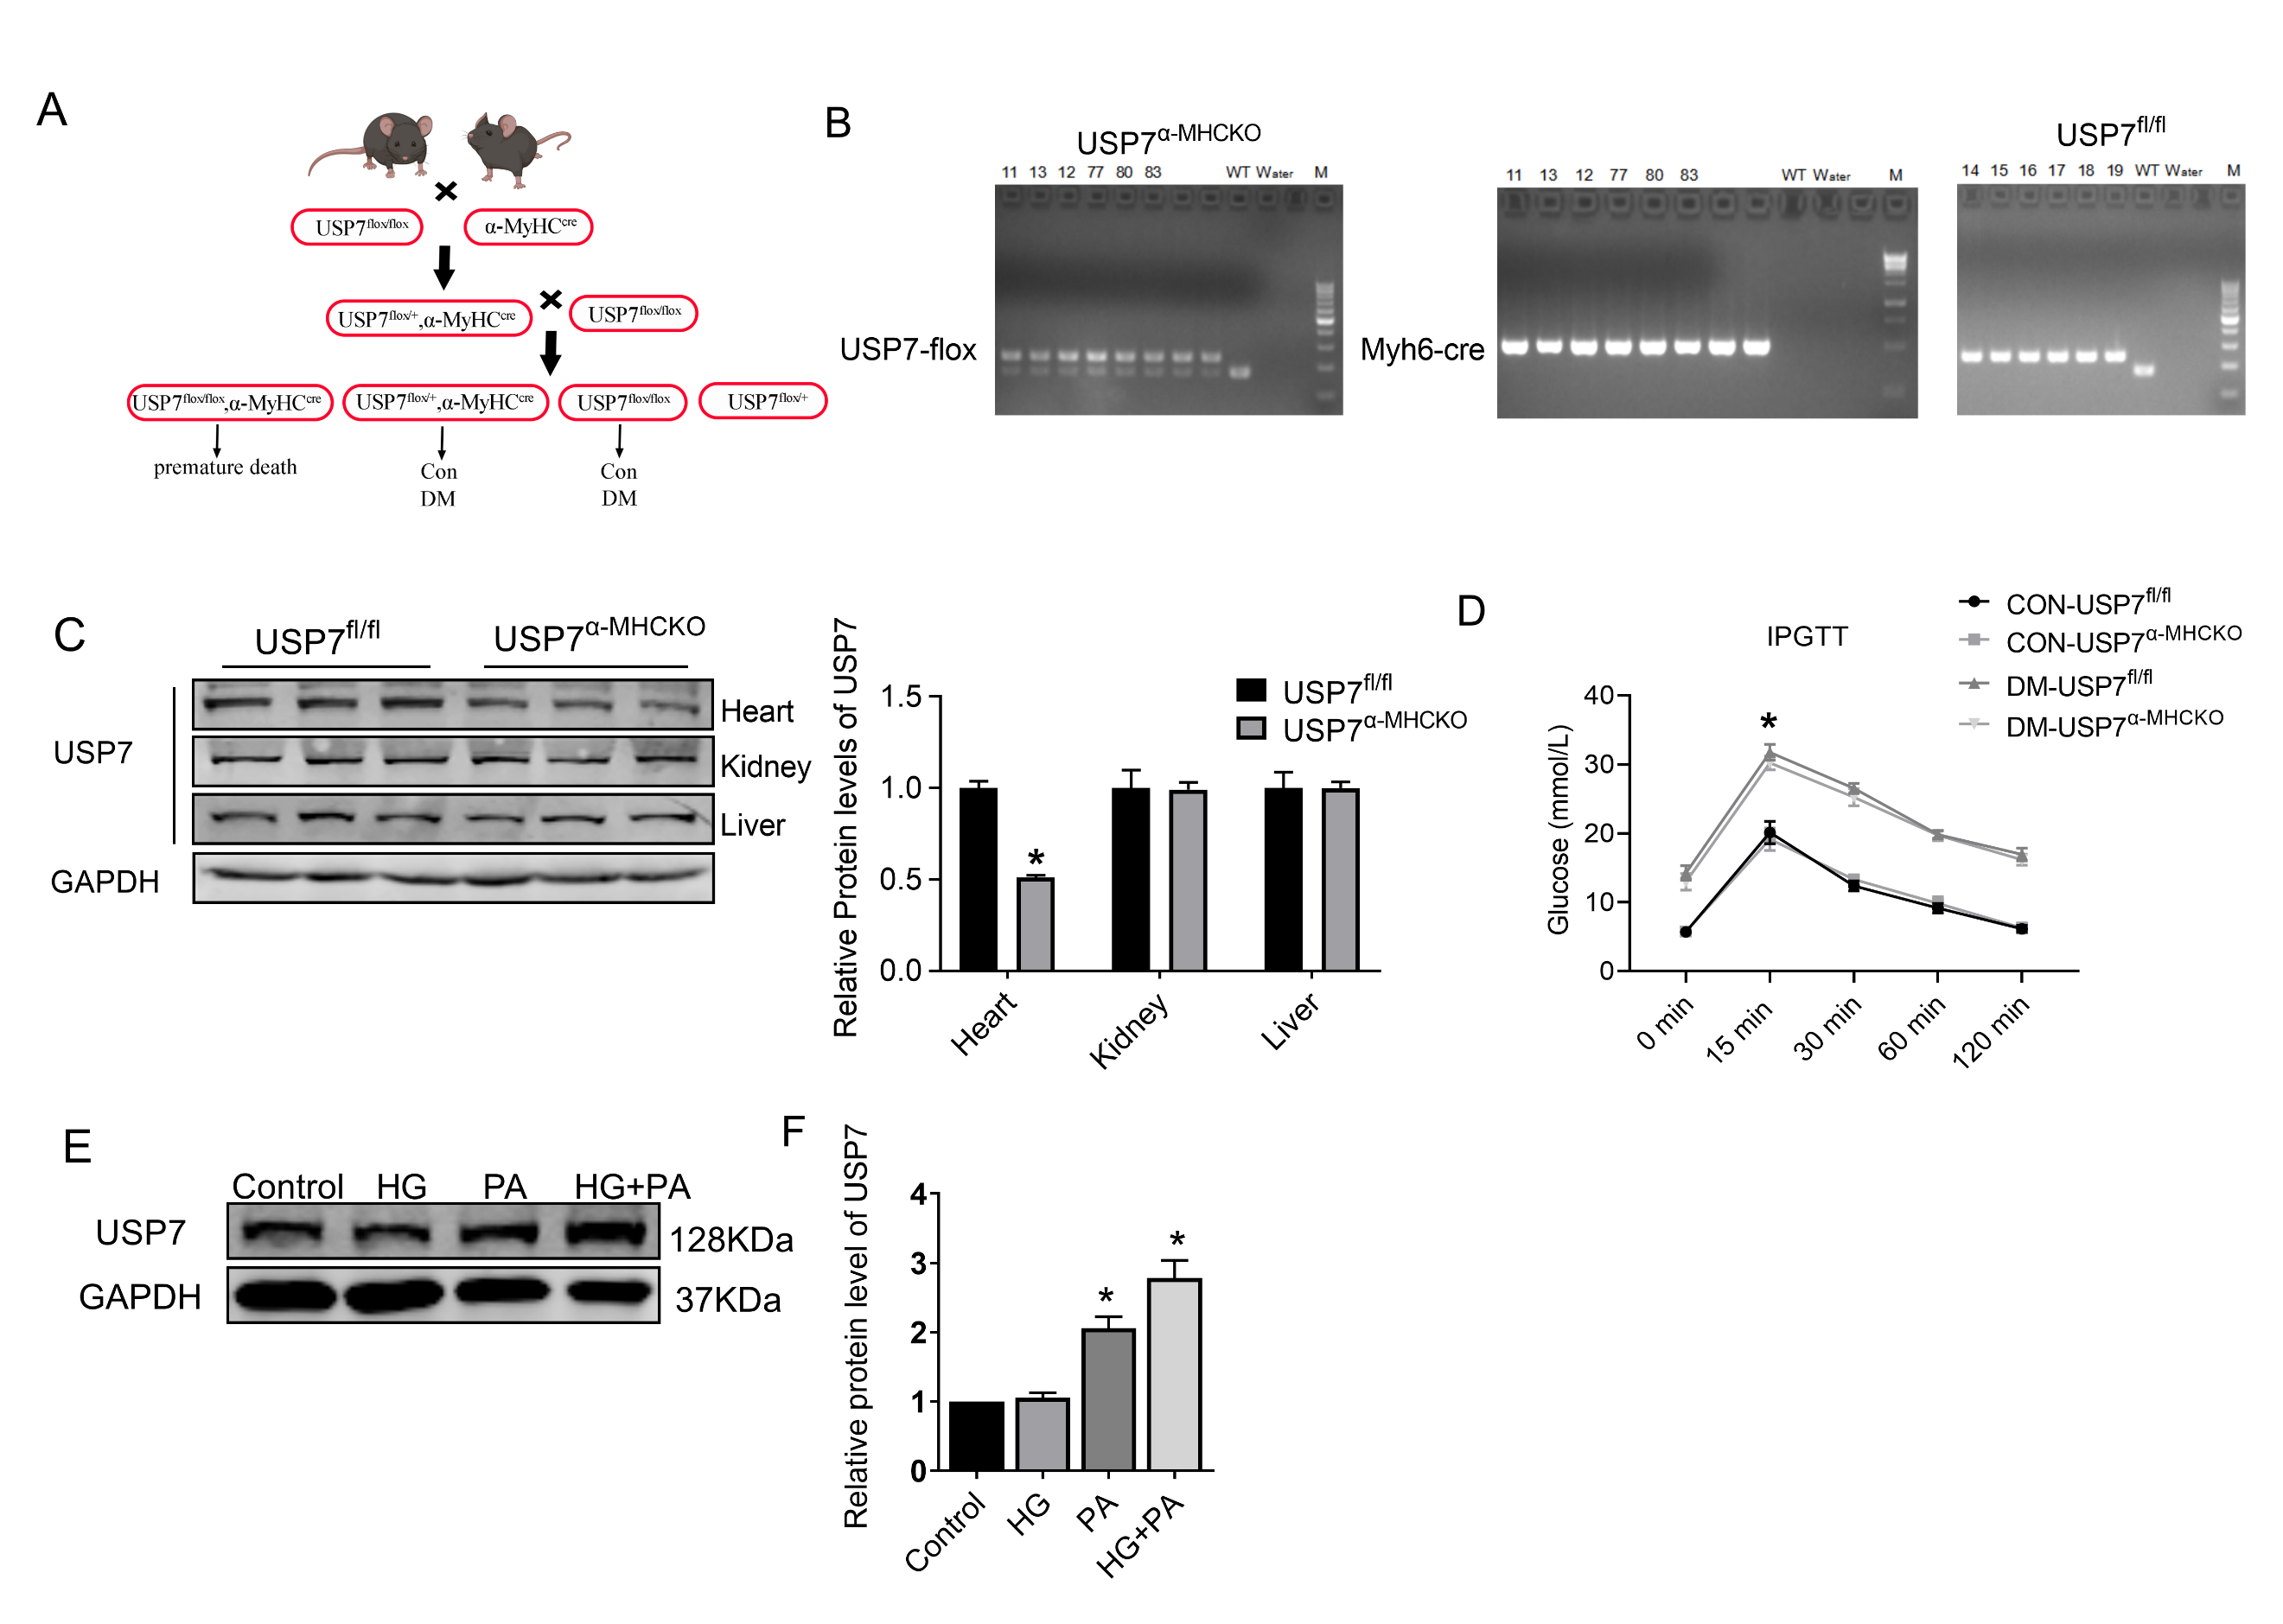


**Fig S1** **Genotyping of cardiomyocyte-specific USP7-knockout mice, and glucose tolerance tests in mice.** (A) Breeding scheme of the mice. (B) Representative genotyping results for the USP7α-MHCKO and control littermates. Pups 11, 13, 12, 77, 80 and 83 were identified as USP7α-MHCKO [USP7fl/fl with cre recombinase (Cre+/0)], and pups 14, 15, 16, 17, 18 and 19 were control littermates [USP7fl/fl without cre recombinase (Cre0/0)]. (C) Representative western blot images and quantitative analysis of USP7 protein expression in the heart, liver and kidney of the USP7fl/fl and USP7α-MHCKO mice, n=3. Data were expressed as mean± SEM. **P* <0.01 vs. the USP7fl/fl mice. (D) Intraperitoneal glucose (2mg/g) tolerance test (IPGTT) in the four groupmice. **P* <0.05 vs. the USP7fl/fl control group at 15 min. (E) Representative western blot images and quantitative analysis of USP7 protein expression in the NMCMs treated with HG, PA and HG+PA, n=3. Data were expressed as mean± SEM. **P* <0.01 vs. control.

**Fig S2.**


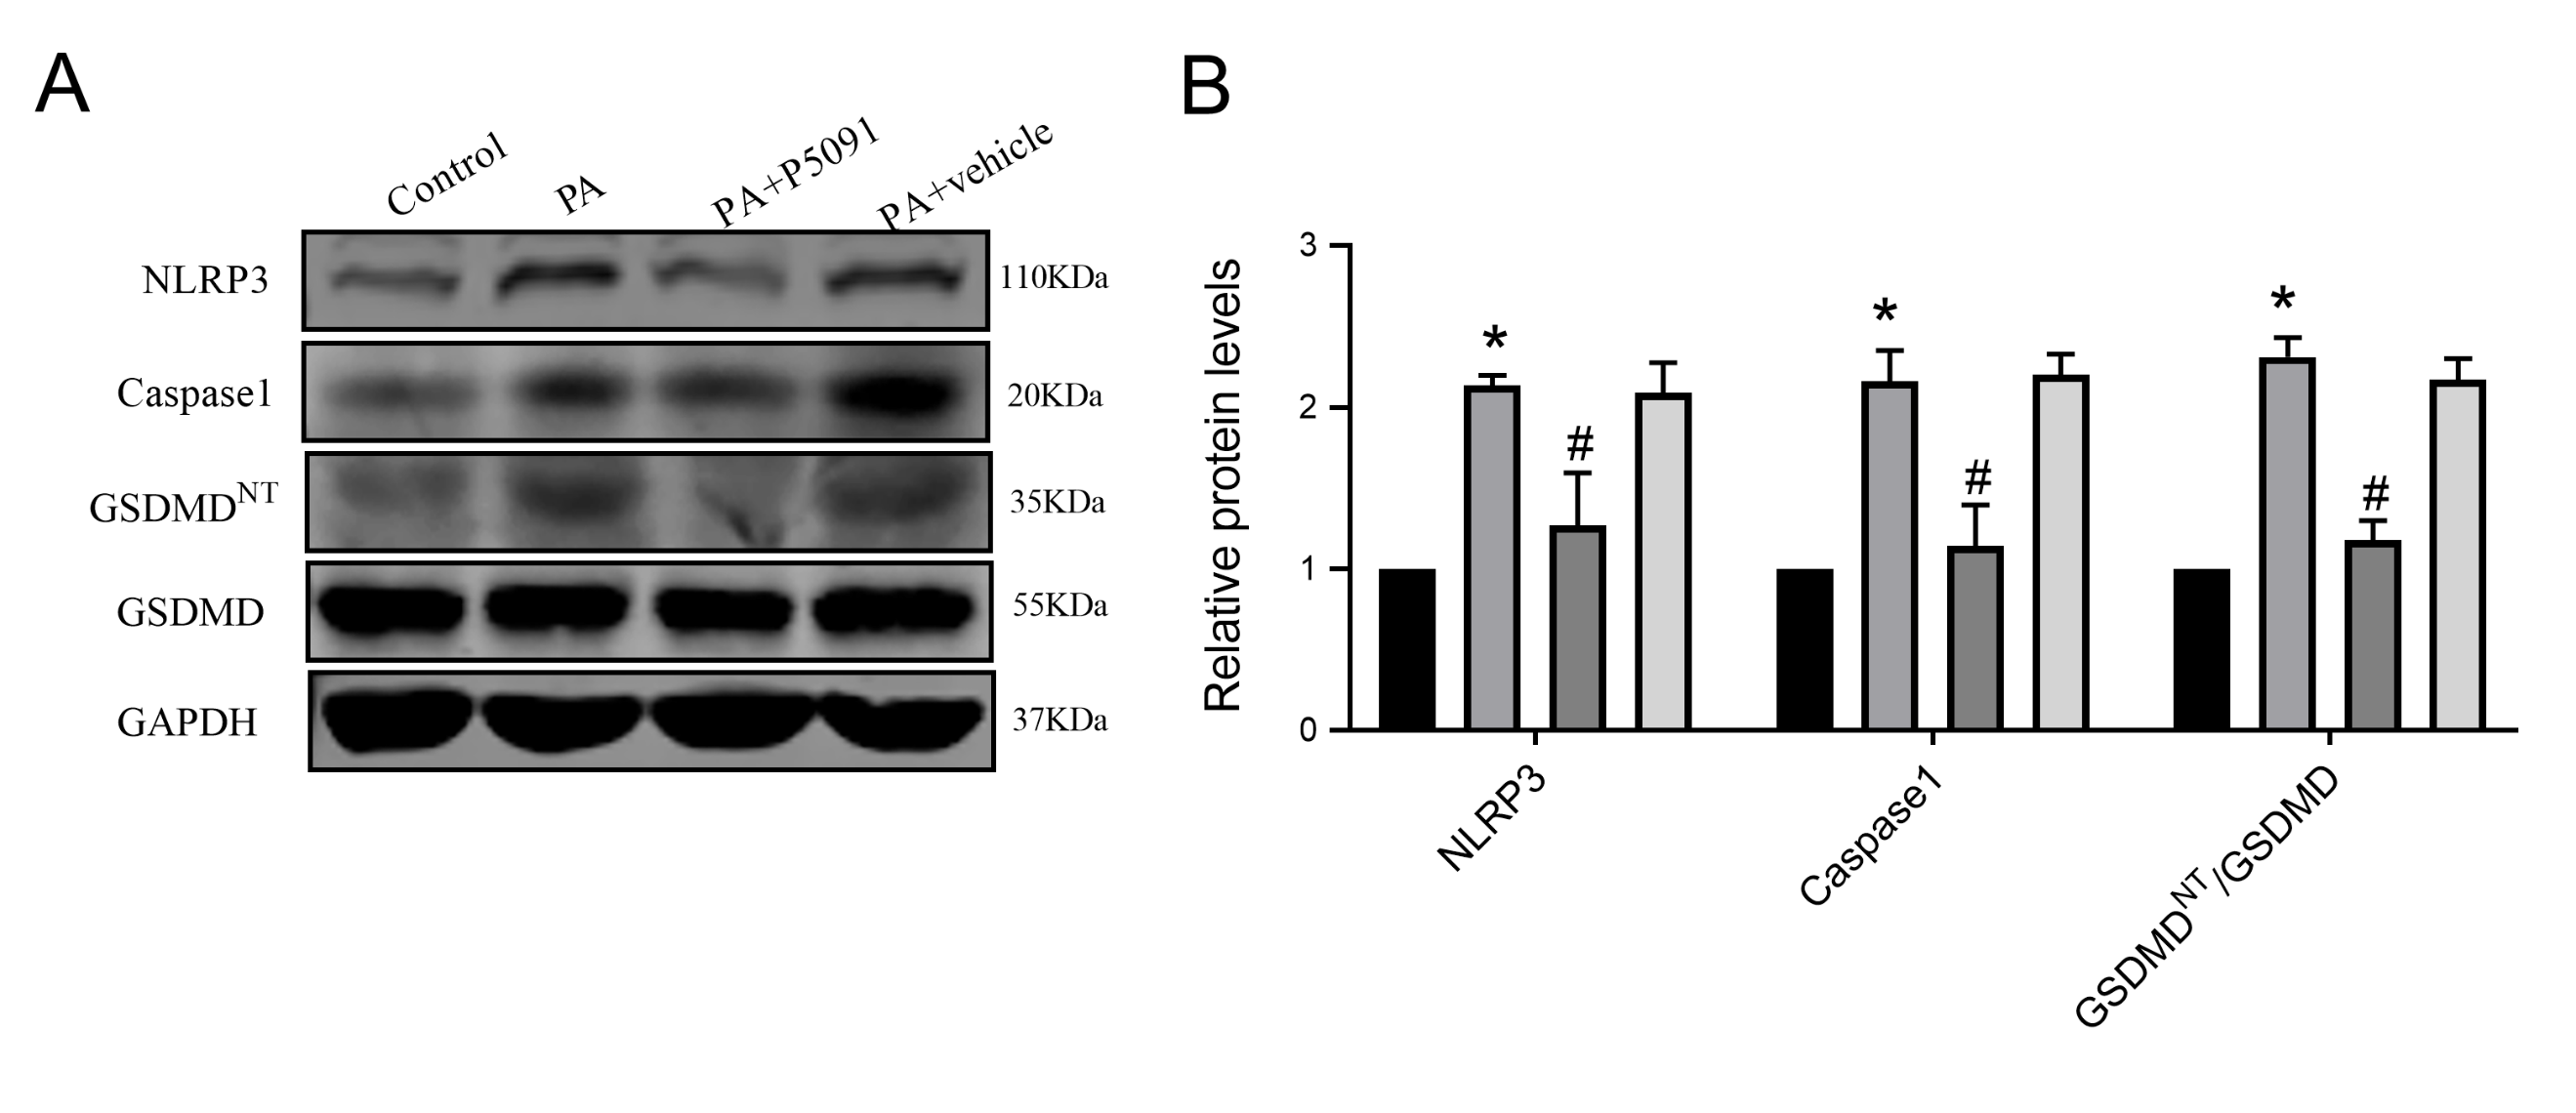


**Fig S2** USP7 inhibitor P5091 can improve PA-induced pyroptosis in vitro. Representative Western blot images and quantitative analysis of NLRP3 Caspase1 and GSDMD-N/GSDMD in four groups of H9c2 cells treated with Control, PA, PA+vehicle and PA+P5091, respectively. n=3 in each group. **P* < 0.05 vs. Control; #P < 0.05 vs. PA.

**Table S1. Body weight, blood glucose and serum lipid profile in mice**

|  | **USP7fl/fl**  **Con (n=8)** | **USP7α-MHCKO Con(n=8)** | **USP7fl/fl**  **DM (n=8)** | **USP7α-MHCKO DM (n=8)** |
| --- | --- | --- | --- | --- |
| **BW (g)** | 28.90±1.4 | 29.15±1.65 | 32.95±1.15* | 32.65±1.25* |
| **FBG (mmol/L)** | 6.70 ±0.60 | 7.25 ±0.65 | 24.30 ±3.40 * | 22.85 ±2.85 * |
| **TC (mmol/L)** | 2.16 ±0.10 | 2.11 ±0.12 | 4.02 ±0.55 * | 3.88 ±0.51 * |
| **TG (mmol/L)** | 0.57 ±0.19 | 0.62 ±0.22 | 2.25 ±0.35 * | 1.91 ±0.38 * |

Data were mean ± SEM; **p* < 0.05 vs. USP7fl/fl control group. BW: body weight; FBG: fasting blood glucose; TC: total cholesterol; TG: triglycerides; USP7fl/fl control: USP7fl/fl non-diabetic mouse group; USP7α-MHCKO control: USP7α-MHCKO non-diabetic mouse group; USP7fl/fl DM: USP7fl/fl diabetic mouse group; USP7α-MHCKO DM: USP7α-MHCKO diabetic mouse group.
